# Supplementary material for: Exploration of the Cs Trapping Phenomenon by Combining Graphene Oxide with α-K6P2W18O62 as Nanocomposite
Source: MDPI journal article supplement (doi:10.3390/ma14195577), 2021-09-26
Supplement: s1 [file s1]

Supplementary materials

# Exploration of the Cs Trapping Phenomenon by Combining Graphene Oxide with $\alpha$ -K<sub>6</sub>P<sub>2</sub>W<sub>18</sub>O<sub>62</sub> as Nanocomposite

Bangun Satrio Nugroho <sup>1,2</sup>, Akane Kato <sup>2</sup>, Chie Kowa <sup>2</sup>, Tomoya Nakashima <sup>2</sup>, Atsushi Wada <sup>2</sup>,  
Muh. Nur Khoiru Wihadi <sup>3,4</sup> and Satoru Nakashima <sup>1,2,5,\*</sup>

<sup>1</sup> Radioactivity Environmental Protection Course, Phoenix Leader Education Program, Hiroshima University, 1-1-1 Kagamiyama, Higashi-Hiroshima 739-8524, Japan; d192886@hiroshima-u.ac.jp

<sup>2</sup> Department of Chemistry, Graduate School of Science, Hiroshima University, 1-3-1 Kagamiyama, Higashi-Hiroshima 739-8526, Japan; kato.akane@jaea.go.jp (A.K.); c.k\_0715\_titty@icloud.com (C.K.); hakatomo0601@gmail.com (T.N.); m204479@hiroshima-u.ac.jp (A.W.)

<sup>3</sup> Department of Chemistry, Faculty of Military Mathematics and Natural Science, The Republic of Indonesia Defense University, Bogor 16810, Indonesia; nur.wihadi@idu.ac.id

<sup>4</sup> National Research and Innovation Agency (Badan Riset dan Inovasi Nasional), The Republic of Indonesia, Kawasan Puspiptek, Serpong, Tangerang 15314, Indonesia

<sup>5</sup> Natural Science Center for Basic Research and Development, Hiroshima University, 1-4-2 Kagamiyama, Higashi-Hiroshima 739-8526, Japan

\* Correspondence: snaka@hiroshima-u.ac.jp

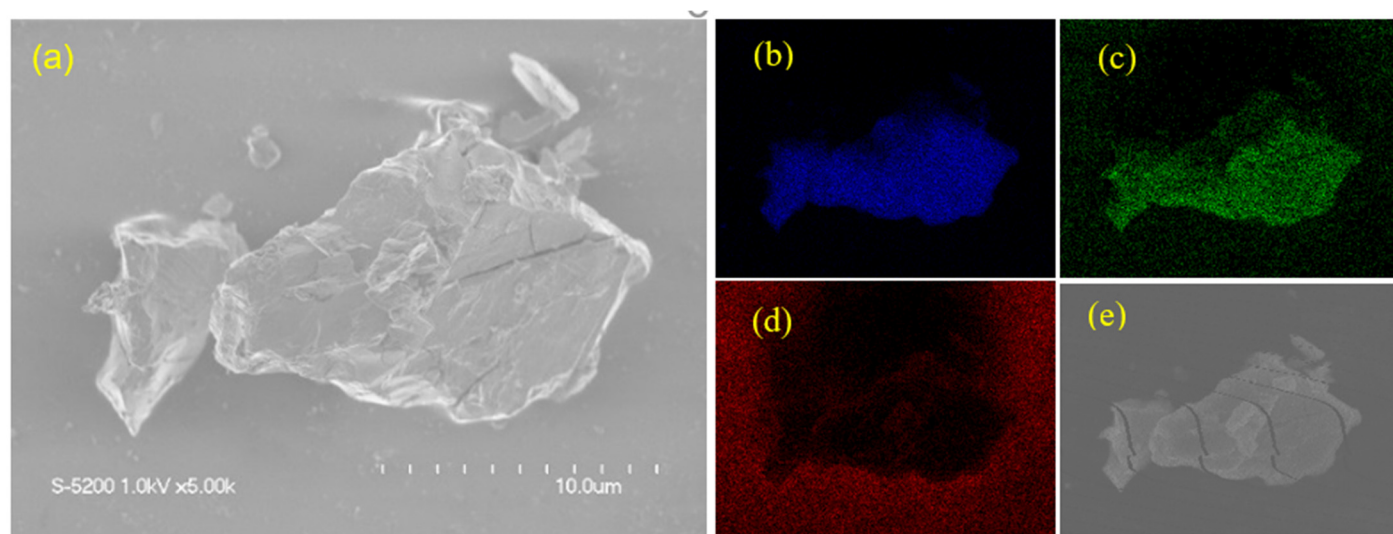

**Figure S1.** SEM measurement (a)  $\alpha$ -K<sub>6</sub>P<sub>2</sub>W<sub>18</sub>O<sub>62</sub>·14H<sub>2</sub>O (b) Tungsten element (c) Oxygen element (d) Carbon K-  $\alpha$  X-ray element (e) Secondary electron image.

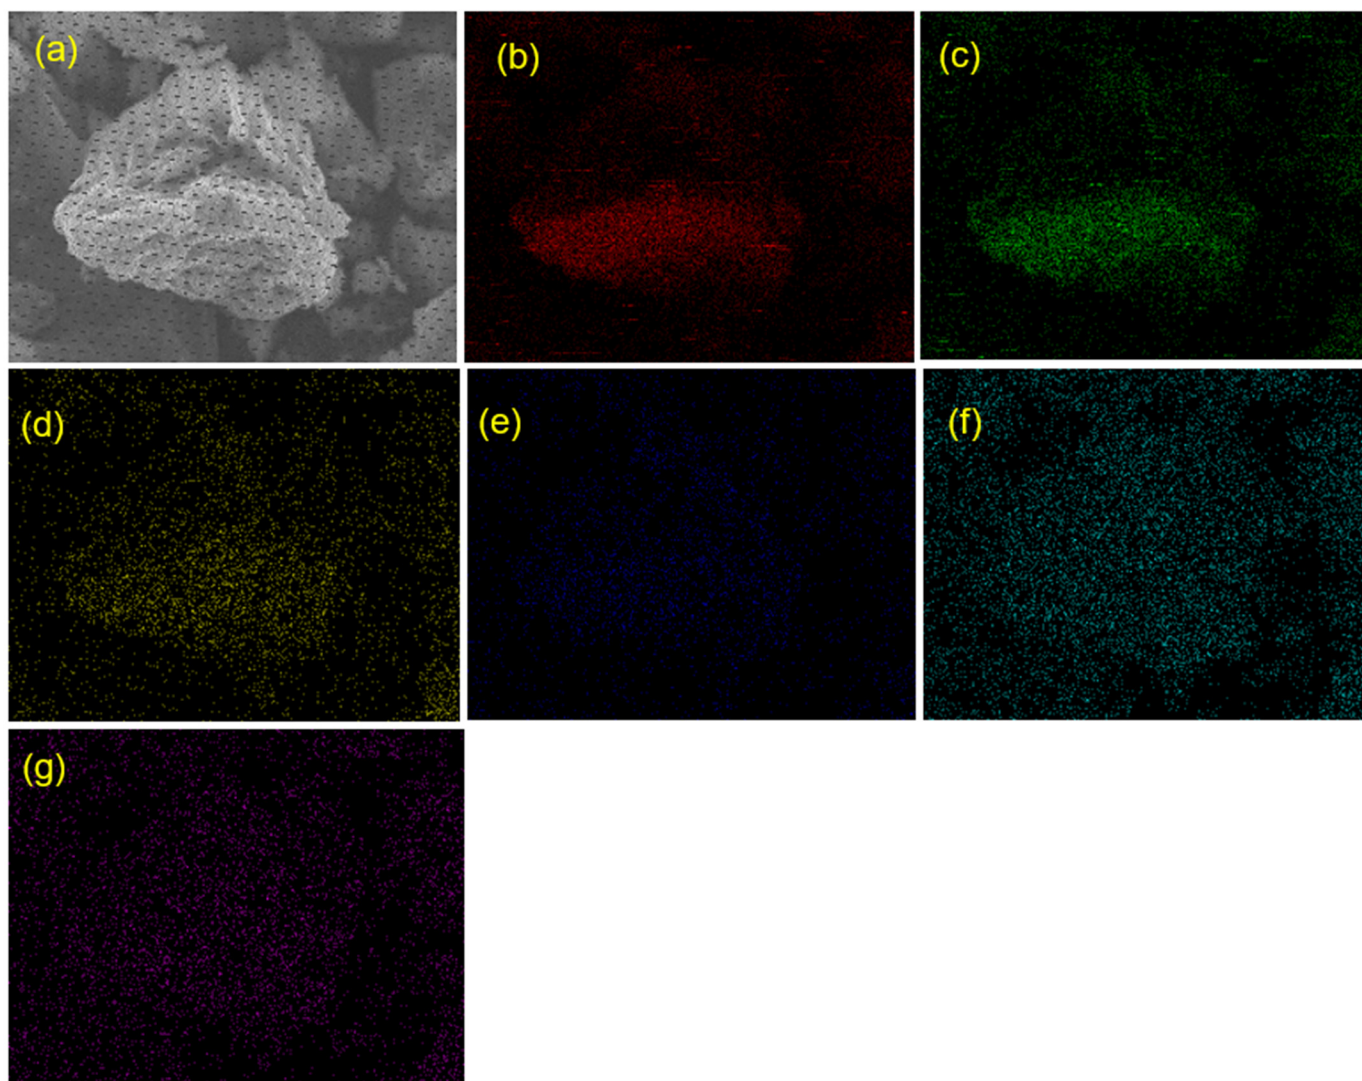

**Figure S2.** SEM measurement,  $[GO_{70}POM]_{41}$  (a) Secondary electron image (b) Carbon K-  $\alpha$  X-ray element (c) Oxygen element (d) Tungsten element (e) Aluminum element (f) Cesium element (g) Chloride element.

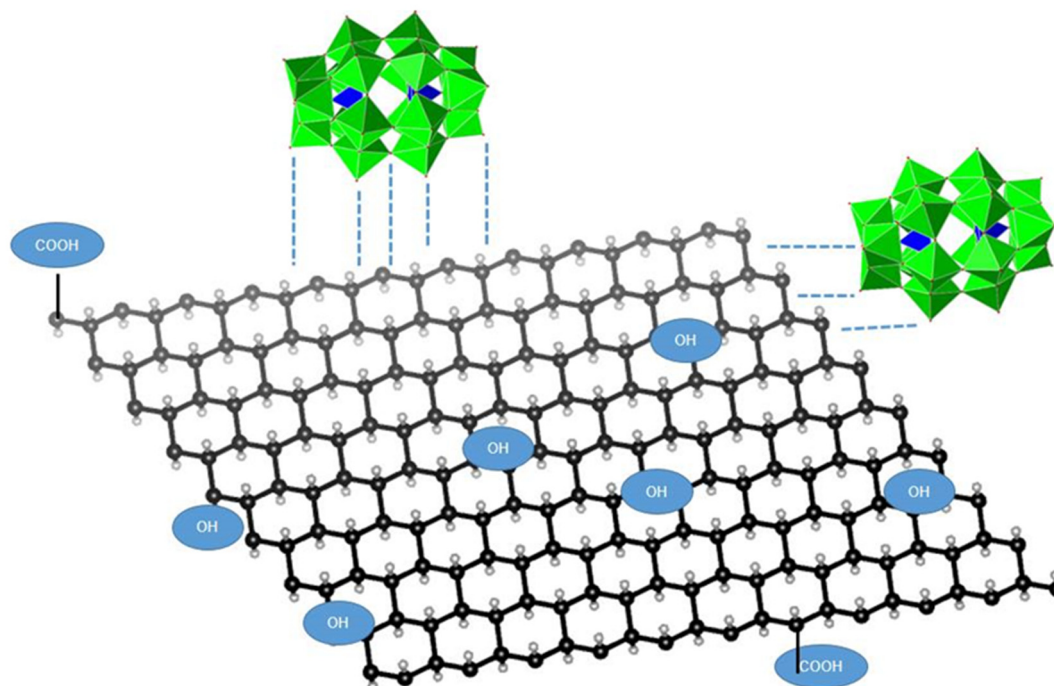

**Figure S3.** Plausible Interaction between Graphene-Oxide (GO) and Dawson-type Polyoxometalates (POMs). The black and the grey balls corresponds to carbon and hydrogen. The polyhedral model represents to Dawson-type polyoxometalates. The blue dashes indicated of the presence of interaction between GO-POMs.

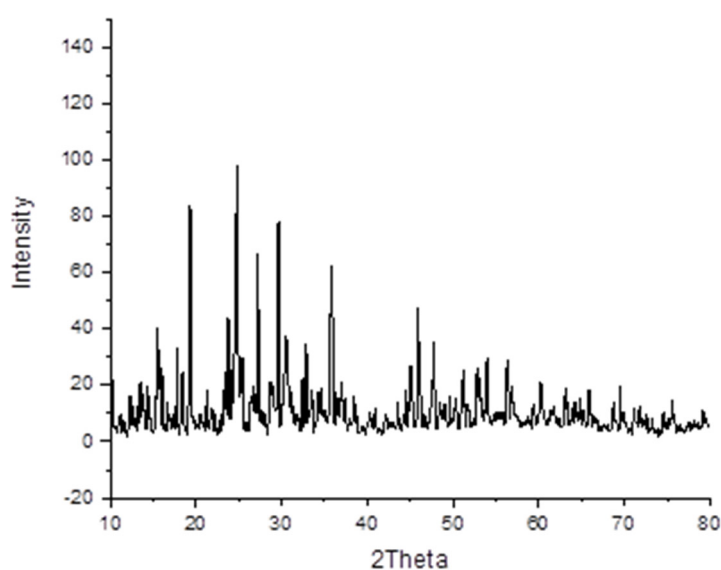

**Figure S4.** Xrd pattern of  $\alpha\text{-K}_6\text{P}_2\text{W}_{18}\text{O}_{62}\cdot 14\text{H}_2\text{O}$ .

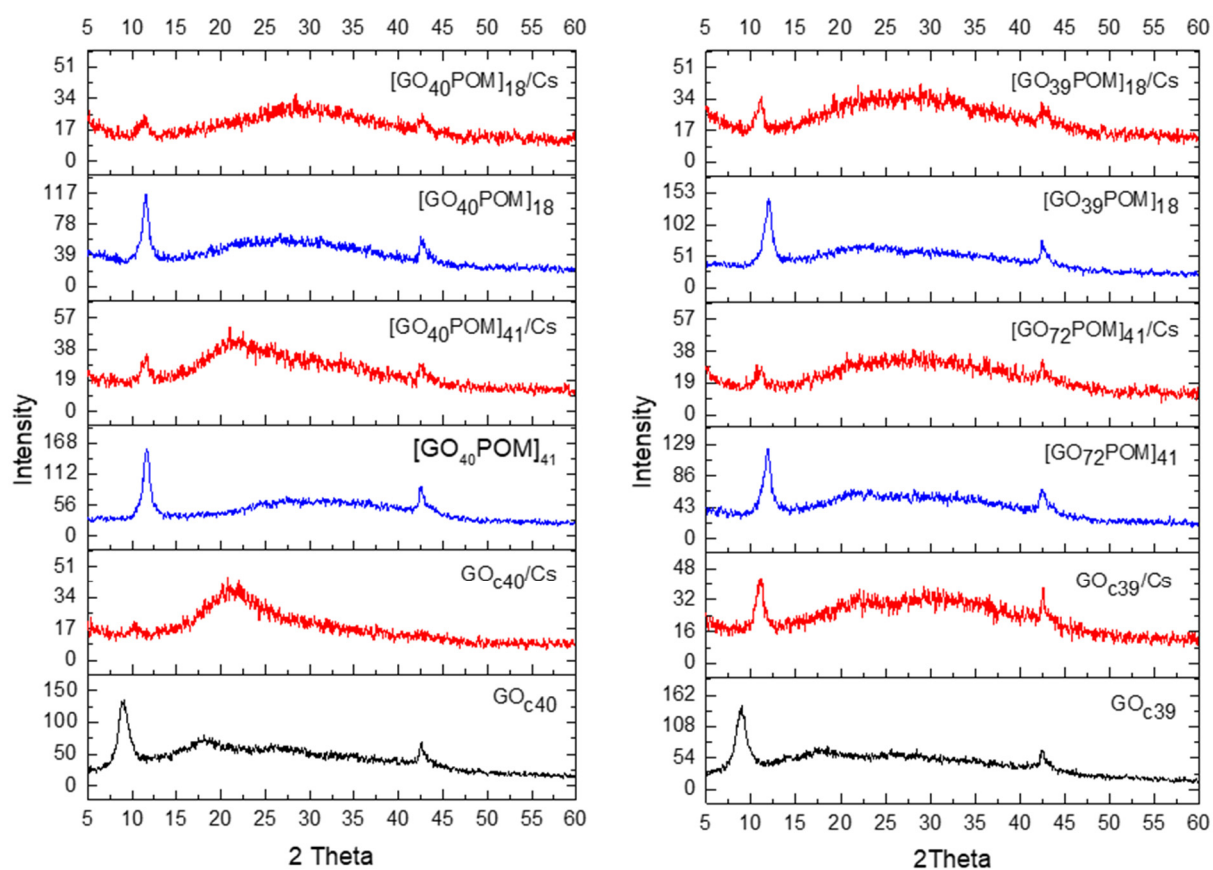

Figure S5. XRD pattern of GO<sub>c39</sub>, GO<sub>c40</sub>, GOPOM composite before and after Cs adsorption.

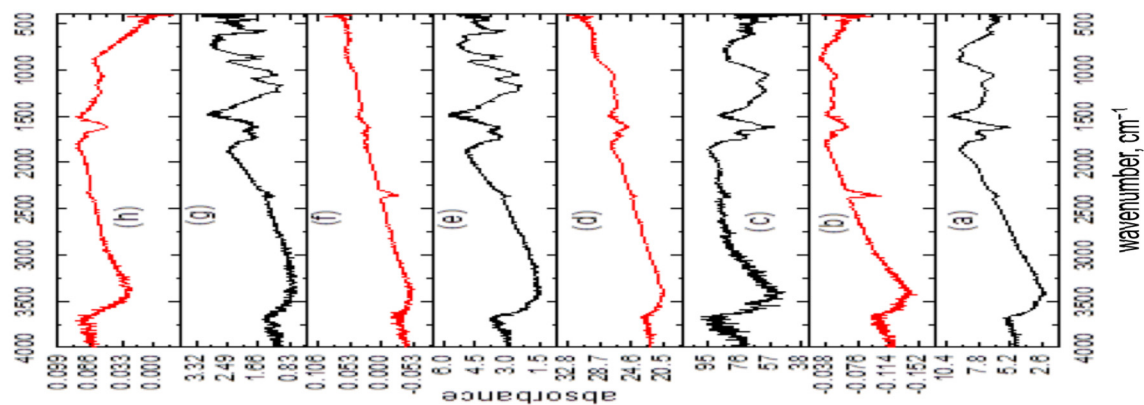

**Figure S6.** IR spectra for (a)  $\text{GO}_{70}$  (b)  $\text{GO}_{72}$  after Cs adsorption (c)  $\text{GO}_{72}$  (d)  $\text{GO}_{72}$  after Cs adsorption (e)  $\text{GO}_{39}$  (f)  $\text{GO}_{39}$  after Cs adsorption (g)  $\text{GO}_{40}$  (h)  $\text{GO}_{40}$  after Cs adsorption.



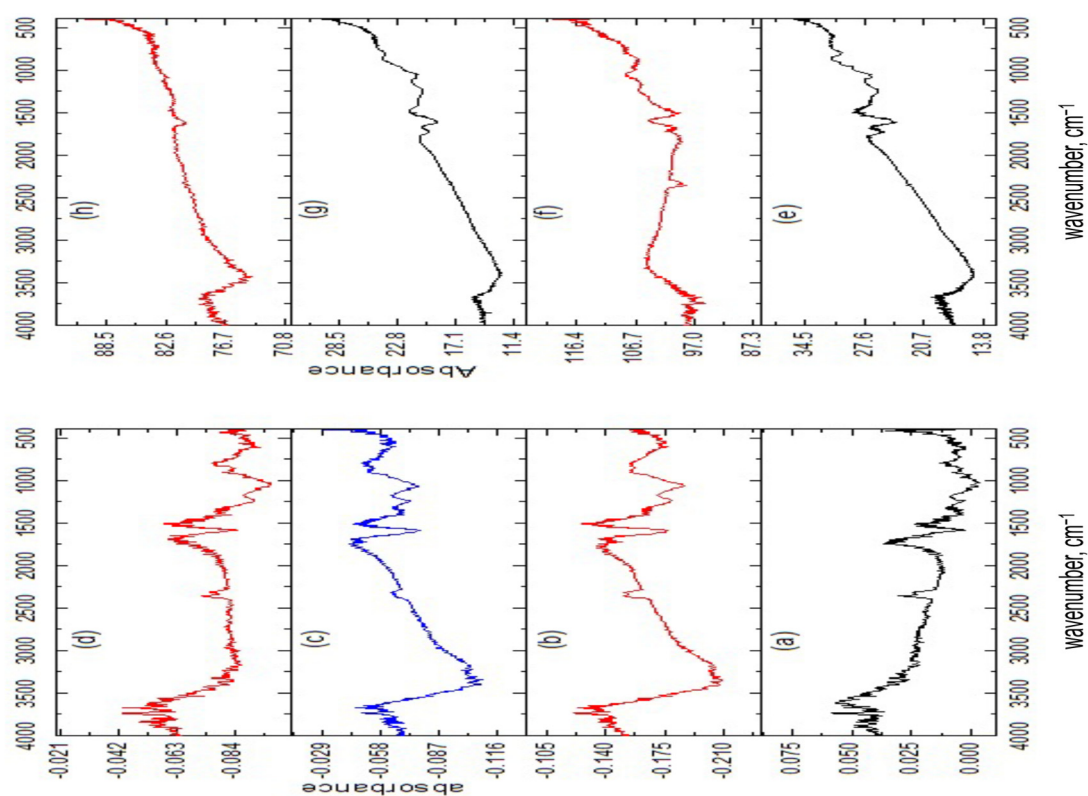

**Figure S7.** IR spectra for (a)  $[\text{GO}_{39}\text{POM}]_{18}$  (b)  $[\text{GO}_{39}\text{POM}]_{18}$  after Cs adsorption (c)  $[\text{GO}_{39}\text{POM}]_{41}$  (d)  $[\text{GO}_{39}\text{POM}]_{41}$  after Cs adsorption (e)  $[\text{GO}_{40}\text{POM}]_{18}$  (f)  $[\text{GO}_{40}\text{POM}]_{18}$  after Cs adsorption (g)  $[\text{GO}_{40}\text{POM}]_{41}$  (h)  $[\text{GO}_{40}\text{POM}]_{41}$  after Cs adsorption.

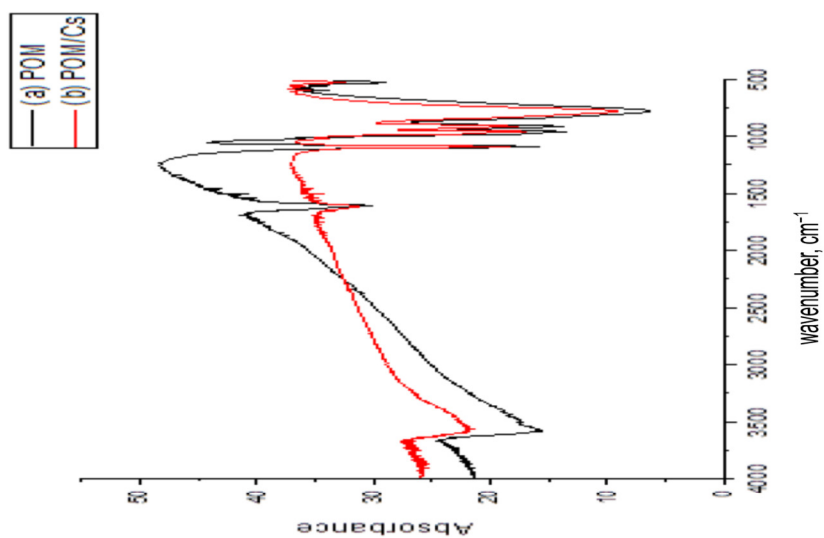

**Figure S8.** IR spectra for (a) POM (b) POM after Cs adsorption.

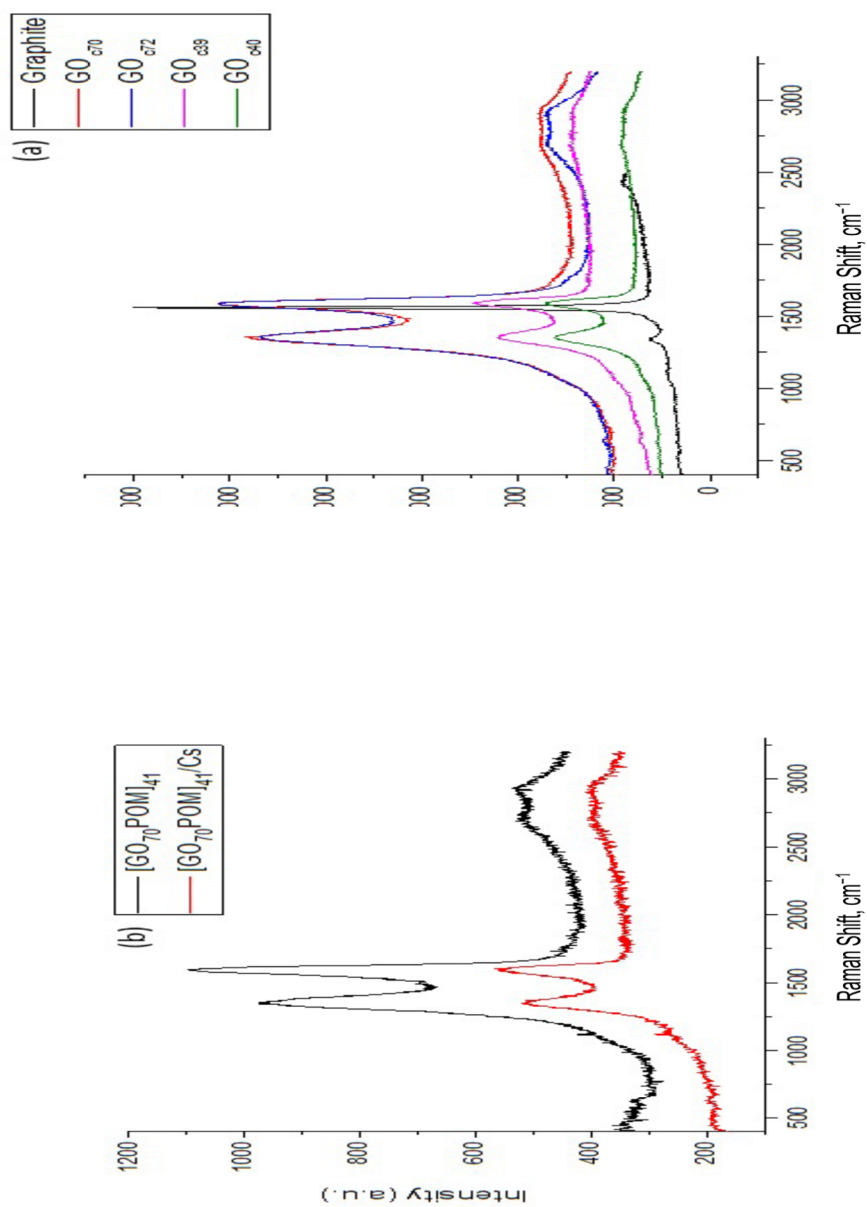

**Figure S9.** Raman spectra (a) Graphite, GO<sub>c70</sub>, GO<sub>c72</sub>, GO<sub>c39</sub>, GO<sub>c40</sub>, (b) [GO<sub>70</sub>POM]<sub>41</sub> and after Cs adsorption.

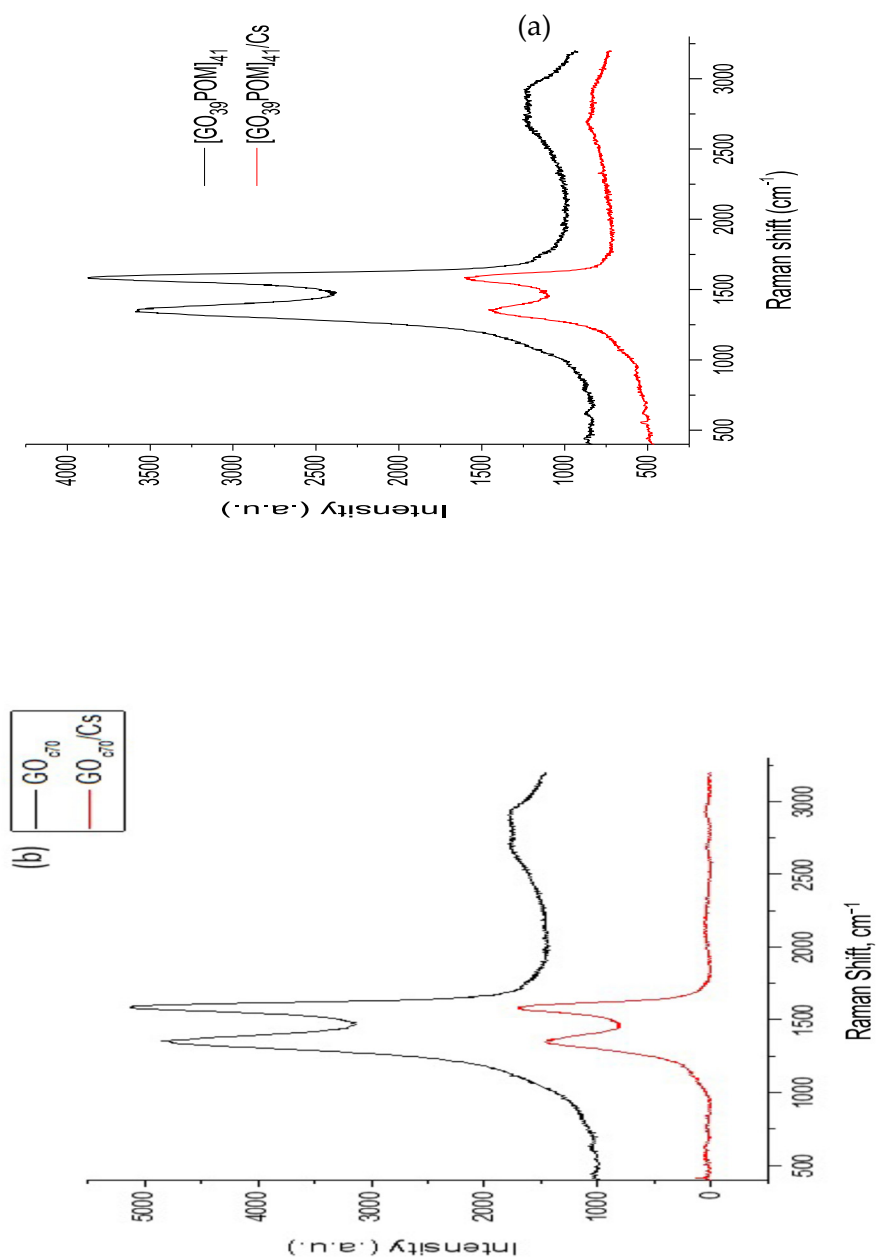

**Figure S10.** Raman spectra composite (a)  $[GO_{39}POM]_{41}$  before and after Cs adsorption (b)  $GO_{c70}$  before and after Cs adsorption.



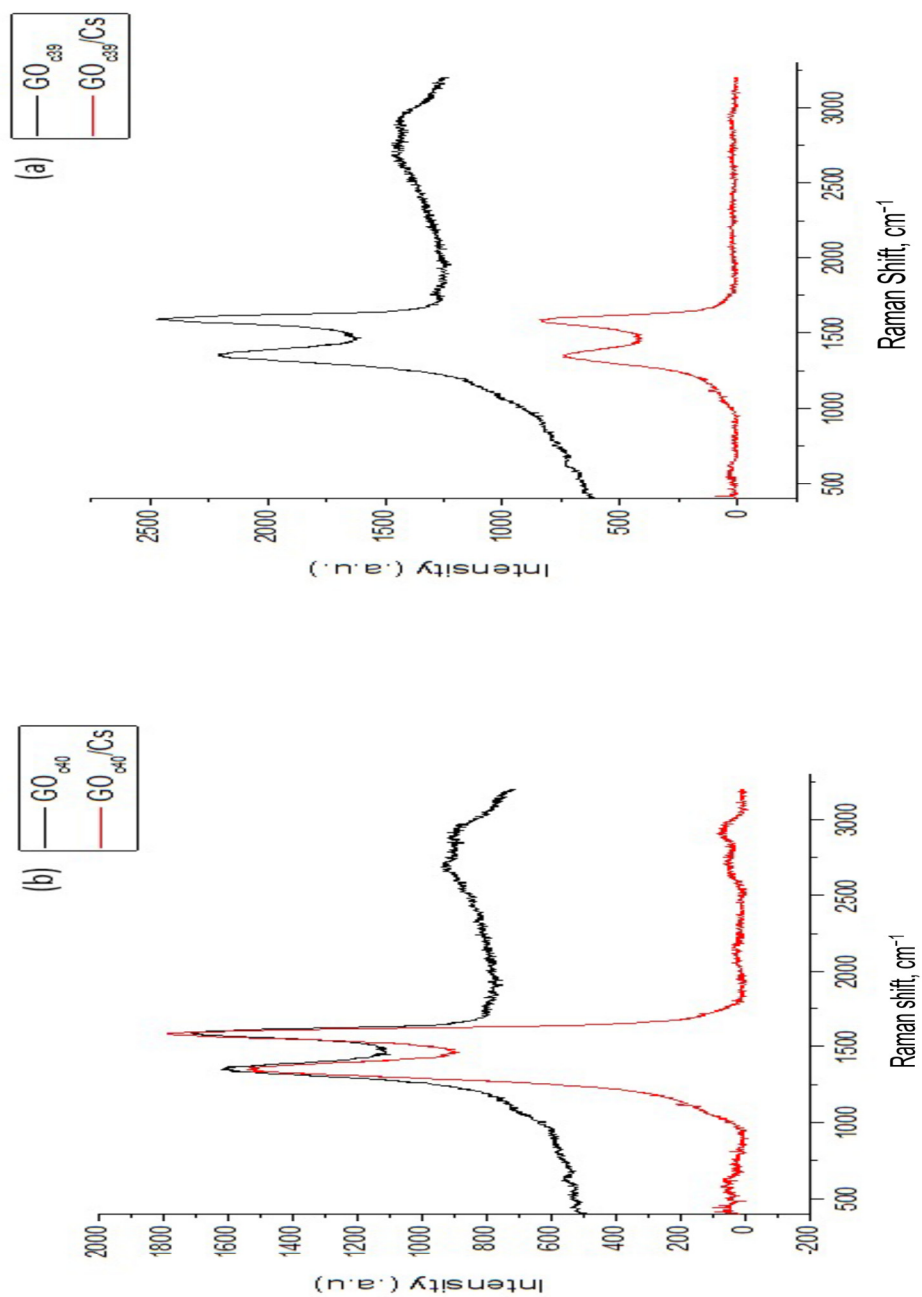

**Figure S11.** Raman spectra (a)  $\text{GO}_{\text{c39}}$  before and after Cs adsorption (b)  $\text{GO}_{\text{c40}}$  before and after Cs adsorption.

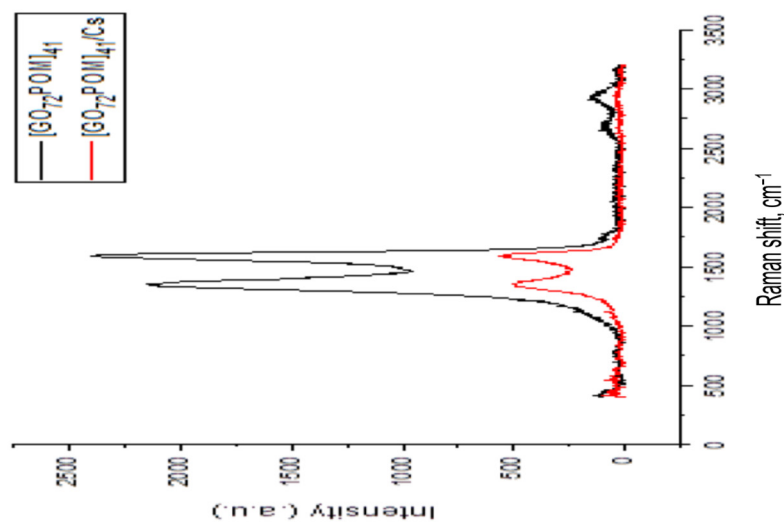

**Figure S12.** Raman spectra composite [GO<sub>72</sub>POM]<sub>41</sub> before and after Cs adsorption.

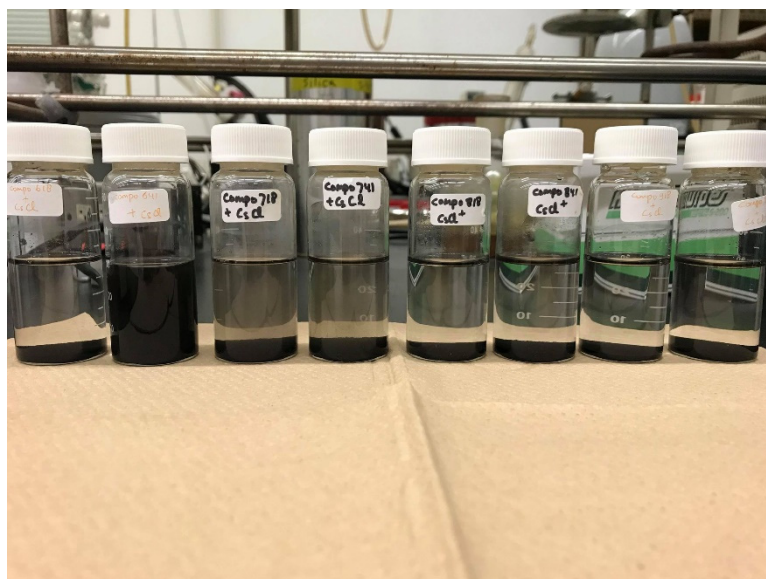

**Figure S13.** The composite solution after Cs adsorption. Only Composite [GO<sub>70</sub>POM]<sub>41</sub> (b) that forms stable solution (black color). Another composite solution shows remains coagulated. The photo was taken after more than one-hour stay at ambient temperature.

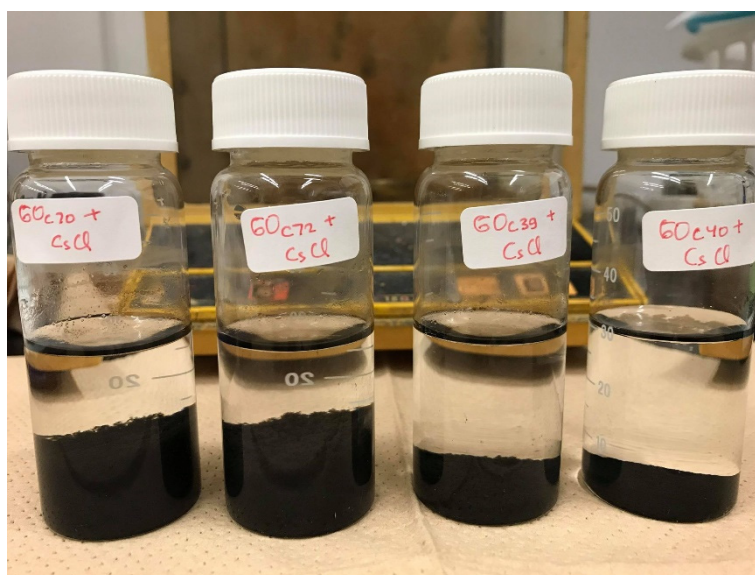

**Figure S14.** The GO solution after Cs adsorption. All GO solutions shows remains coagulated. (a) GO<sub>c70</sub> and (b) GO<sub>c72</sub> shows different coagulated behavior with (c) GO<sub>c39</sub> and (d) GO<sub>c40</sub>. The photo was taken after more than one-hour stay at ambient temperature.

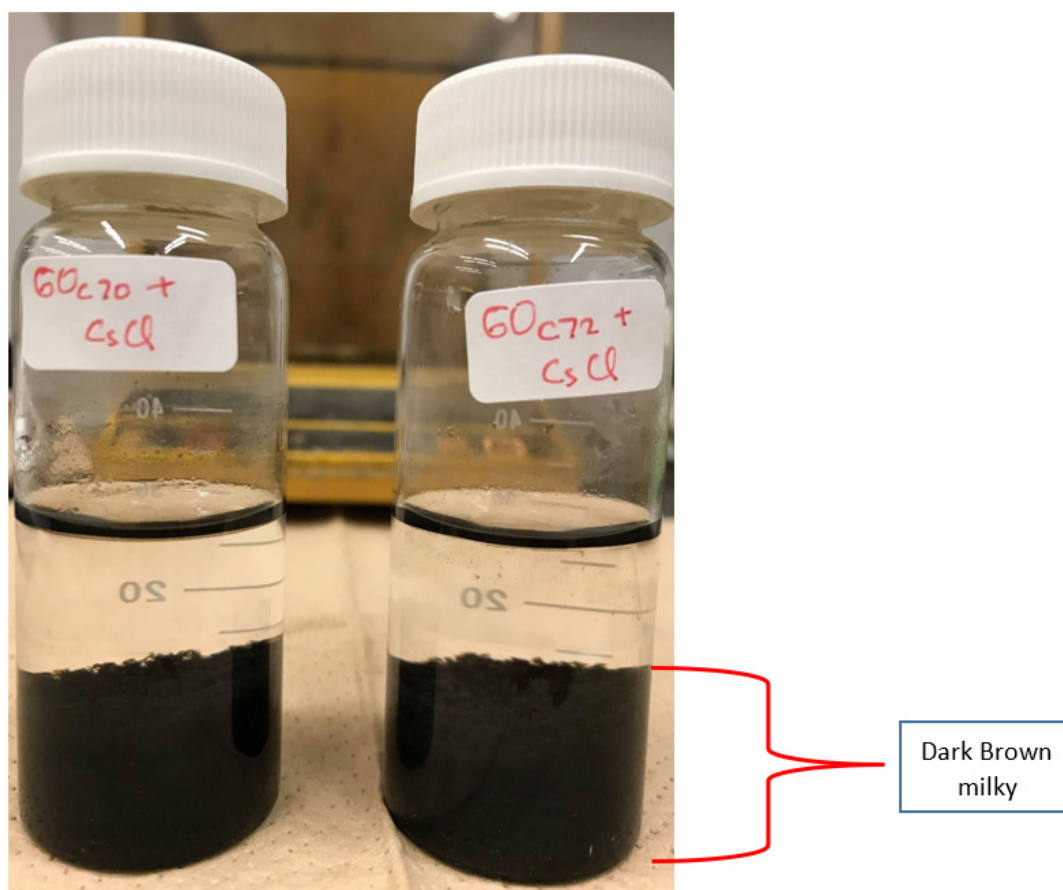

**Figure S15.** Coagulation process after Cs interaction with (a) GO<sub>c70</sub> and (b) GO<sub>c72</sub>. The photo was taken after more than one-hour stay at ambient temperature.

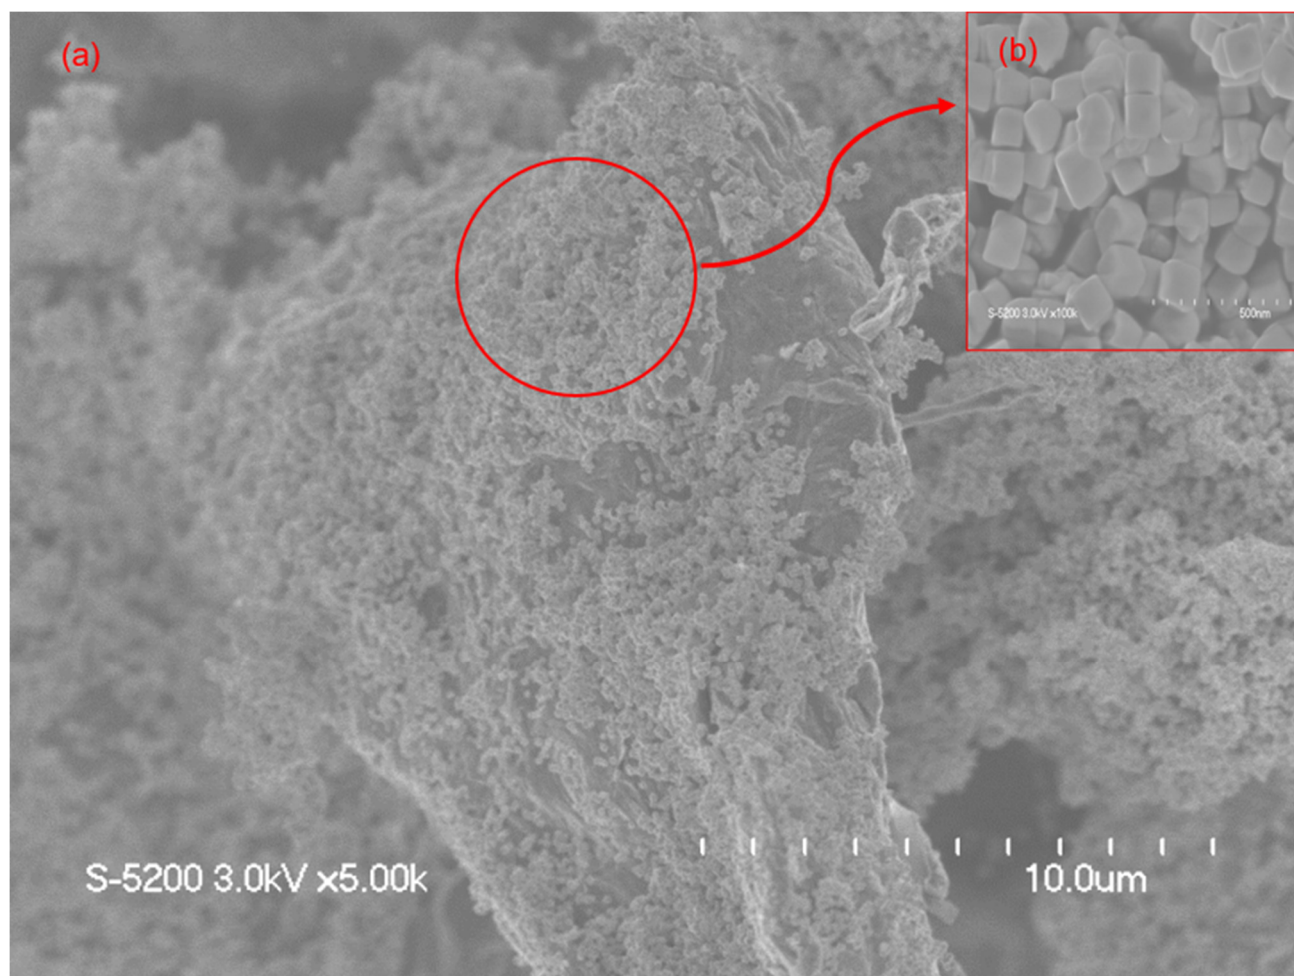

**Figure S16.** SEM image by using composite (a)  $[GO_{70}POM]_{41}$  after Cs adsorption and (b) Cs particle (zoom mode based on figure a).

**Table S1.** The ratio  $I_D/I_G$  of Graphene oxide and composite before and after Cs adsorption.

| No. | Material               | D band | G band | Ratio $I_D/I_G$ |
|-----|------------------------|--------|--------|-----------------|
| 1   | $GO_{c70}$             | 1356   | 1586   | 0.93            |
| 2   | $GO_{c72}$             | 1352   | 1581   | 0.91            |
| 3   | $GO_{c39}$             | 1352   | 1590   | 0.89            |
| 4   | $GO_{c40}$             | 1347   | 1590   | 0.88            |
| 5   | $[GO_{39}POM]_{41}$    | 1347   | 1581   | 0.92            |
| 6   | $[GO_{39}POM]_{41}/Cs$ | 1352   | 1586   | 0.90            |
| 7   | $[GO_{70}POM]_{18}$    | 1347   | 1586   | 0.96            |
| 8   | $[GO_{70}POM]_{18}/Cs$ | 1352   | 1577   | 0.92            |
| 9   | $[GO_{70}POM]_{41}$    | 1357   | 1592   | 0.88            |
| 10  | $[GO_{70}POM]_{41}/Cs$ | 1343   | 1602   | 0.93            |

Table S2. The crystallize size of GO.

| Sample                               | Concentration ratio GO:POM | 2 $\Phi$ (°) | FWHM (β) | Out of plane crystallite size d (nm)<br>– D (nm) |      | D (nm)<br>after Cs adsorption | Layer (n) | In plane crystallite size – L (nm) |
|--------------------------------------|----------------------------|--------------|----------|--------------------------------------------------|------|-------------------------------|-----------|------------------------------------|
| Graphite                             | -                          | 26.6         | 0.28     | 30.49                                            | 0.34 | -                             | 90.67     | 10.27                              |
| GO <sub>c70</sub>                    | -                          | 11.58        | 1.93     | 4.3                                              | 0.77 | -                             | 6.58      | 2.59                               |
| GO <sub>c72</sub>                    | -                          | 8.66         | 1.69     | 4.9                                              | 1.02 | -                             | 5.80      | 2.53                               |
| GO <sub>c39</sub>                    | -                          | 8.91         | 1.57     | 5.3                                              | 0.99 | -                             | 6.19      | 2.56                               |
| GO <sub>c40</sub>                    | -                          | 9.13         | 1.47     | 5.7                                              | 0.97 | -                             | 6.75      | 2.61                               |
| [GO <sub>70</sub> POM] <sub>18</sub> | 1:8                        | 12.28        | 1.63     | 5.12                                             | 0.72 | 0.79                          | -         | 2.54                               |
| [GO <sub>70</sub> POM] <sub>41</sub> | 4:1                        | 10.99        | 1.48     | 5.64                                             | 0.81 | 0.86                          | -         | 2.61                               |
| [GO <sub>72</sub> POM] <sub>18</sub> | 1:8                        | 12.75        | 1.10     | 7.60                                             | 0.69 | 0.77                          | -         | 3.04                               |
| [GO <sub>72</sub> POM] <sub>41</sub> | 4:1                        | 12.05        | 1.07     | 7.80                                             | 0.73 | 0.79                          | -         | 3.09                               |
| [GO <sub>39</sub> POM] <sub>18</sub> | 1:8                        | 11.92        | 1.19     | 7.02                                             | 0.74 | 0.81                          | -         | 2.89                               |
| [GO <sub>39</sub> POM] <sub>41</sub> | 4:1                        | 11.86        | 1.07     | 7.80                                             | 0.74 | 0.79                          | -         | 3.09                               |
| [GO <sub>40</sub> POM] <sub>18</sub> | 1:8                        | 11.57        | 0.84     | 9.94                                             | 0.76 | 0.83                          | -         | 3.71                               |
| [GO <sub>40</sub> POM] <sub>41</sub> | 4:1                        | 11.57        | 0.24     | 34.78                                            | 0.76 | 0.78                          | -         | 11.95                              |

\*FWHM was calculated by using origin software.
